# Supplementary material for: Impaired intracortical inhibition demonstrated in vivo in people with Dravet syndrome
Source: PubMed Central journal article supplement (PMC5405762; doi:10.1212/wnl.0000000000003868), 2017-04-25
Supplement: supp_WNL.0000000000003868_e-tables.pdf [file supp_WNL.0000000000003868_e-tables.pdf]

| Subject number | Sex, Age | SCN1A mutation                                                                                                 | Age at first seizure | First seizure while febrile | Learning difficulties | EEG                                                                                  | MRI                        | Seizure types | Additional information                                                                                                                                              |
|----------------|----------|----------------------------------------------------------------------------------------------------------------|----------------------|-----------------------------|-----------------------|--------------------------------------------------------------------------------------|----------------------------|---------------|---------------------------------------------------------------------------------------------------------------------------------------------------------------------|
| D1             | F, 34    | c.4384T>C; reported in association with Dravet Syndrome, and described in detail in Catarino et al.* (case 11) | 7 months             | Yes                         | Severe                | Multifocal spike and wave discharges with frequent seizures                          | Normal study               | GTCS, TS      | Prolonged lateralised seizures at 8 months. Detailed description of phenotype in Catarino et al.* (Case 11)                                                         |
| D2             | M, 20    | c.664C>T de novo                                                                                               | 6 months             | Yes                         | Severe                | Multifocal spikes (interictal record only)                                           | Not available              | GTCS          | Prolonged lateralised seizures, myoclonic jerks                                                                                                                     |
| D3             | F, 41    | c.2522C>G                                                                                                      | 8 months             | Yes                         | Severe                | Global dysfunction without epileptiform activity                                     | No gross abnormality       | GTCS, TS      | Prolonged hemiclonic febrile seizure at onset, recurrent febrile and afebrile seizures, delayed development after seizure onset. Gait and behavioural difficulties. |
| D4             | M, 28    | c.3706-2A>G; leading to aberrant splicing                                                                      | 5 months             | Yes                         | Severe                | Multifocal sharp waves and multiple seizures recorded                                | Left hippocampal sclerosis | GTCS, TS      | 30 minute lateralised seizure at onset, development normal at 6 months but then delayed. Described in Catarino et al.* (Case 21).                                   |
| D5             | F, 21    | c.429delGT; frameshift, generating premature stop codon leading to premature protein truncation                | 4 months             | Yes                         | Moderate              | Independent left and right sided spike and wave, epileptiform abnormalities in sleep | No gross abnormality       | GTCS, MJ      | Worse seizure control with sodium blockers. Typical crouched gait.                                                                                                  |
| D6             | F, 19    | c.787delC; de novo                                                                                             | 4 months             | Yes                         | Moderate              | Multiple seizures captured with possible right centroparietal onset                  | No gross abnormality       | GTCS          | Seizure onset at 4 months with 90 minute generalised seizure                                                                                                        |

Supplementary table e-1: Phenotypic information for people with Dravet Syndrome. Abbreviations: GTCS = generalised tonic clonic seizure, TS = tonic seizure, MJ = myoclonic jerk.

\*Catarino et al. 'Dravet syndrome as epileptic encephalopathy: evidence from long-term course and neuropathology', Brain 2011 Oct;134(Pt 10):2982-3010

| Subject number | <i>Seizure types and frequency</i>                                                                  |
|----------------|-----------------------------------------------------------------------------------------------------|
| D1             | Two generalised tonic-clonic seizures per week, five motor seizures per week with loss of awareness |
| D2             | One to two generalised tonic-clonic seizures per month                                              |
| D3             | One generalised tonic-clonic seizure per month, daily motor seizures with loss of awareness         |
| D4             | Two generalised tonic-clonic seizure per week, three motor seizures per week with loss of awareness |
| D5             | Two generalised tonic-clonic seizures per week, frequent myoclonus                                  |
| D6             | Four generalised tonic-clonic seizures per week                                                     |
| Subject number |                                                                                                     |
| E1             | Five to ten focal motor seizures daily                                                              |
| E2             | One focal aware seizure per week, one focal unaware seizure per month                               |
| E3             | Five focal unaware seizures per month, one generalised tonic-clonic seizure per month               |
| E4             | One generalised tonic-clonic seizure per month                                                      |
| E5             | One generalised tonic-clonic seizure per week                                                       |
| E6             | One generalised tonic-clonic seizure per month, two focal unaware seizures per day                  |
| E7             | Five generalised tonic-clonic seizures per year, three focal unaware seizures per week              |
| E8             | Two focal unaware seizures per day                                                                  |
| E9             | One focal unaware seizure per year                                                                  |
| E10            | One generalised tonic-clonic seizure per month, one absence seizure per week                        |

Supplementary table e-2: Seizure types and frequency for each subject with epilepsy
